# Supplementary material for: Co-crystal AX·(H3C3N3O3) (A = Na, Rb, Cs; X = Br, I): a series of strongly anisotropic alkali halide cyanurates with a planar structural motif and large birefringence
Source: Royal Society of Chemistry journal article supplement (doi:10.1039/d1dt02217b), 2021-01-01
Supplement: d1dt02217b1.pdf [file d1dt02217b1.pdf]

## Supporting Information

### **Co-crystal AX·(H<sub>3</sub>C<sub>3</sub>N<sub>3</sub>O<sub>3</sub>) (A = Na, Rb, Cs; X = Br, I): a series of strongly anisotropic alkali halide cyanurates with planar structural motif and large birefringence**

Jinhui Wang,<sup>a</sup> Xinyuan Zhang,<sup>\*a</sup> Fei Liang,<sup>\*b</sup> Zhanggui Hu<sup>a</sup> and Yicheng Wu<sup>a, b</sup>

<sup>a</sup> Tianjin Key Laboratory of Functional Crystal Materials, Institute of Functional Crystals, Tianjin

University of Technology, Tianjin 300384, China.

<sup>b</sup> State Key Laboratory of Crystal Materials and Institute of Crystal Materials, Shandong University,

Jinan 250100, China.

## Contents.

**Table S1.** Fractional atomic coordinates ( $\times 10^4$ ) and equivalent isotropic displacement parameters ( $\text{\AA}^2 \times 10^3$ ) of **I**.

**Table S2.** Fractional atomic coordinates ( $\times 10^4$ ) and equivalent isotropic displacement parameters ( $\text{\AA}^2 \times 10^3$ ) of **II**.

**Table S3.** Fractional atomic coordinates ( $\times 10^4$ ) and equivalent isotropic displacement parameters ( $\text{\AA}^2 \times 10^3$ ) of **III**.

**Table S4.** Anisotropic displacement parameters ( $\text{\AA}^2 \times 10^3$ ) of **I**.

**Table S5.** Anisotropic displacement parameters ( $\text{\AA}^2 \times 10^3$ ) of **II**.

**Table S6.** Anisotropic displacement parameters ( $\text{\AA}^2 \times 10^3$ ) of **III**.

**Table S7.** Selected bond lengths [ $\text{\AA}$ ] of **I - III**.

**Table S8.** Selected bond angles ( $^\circ$ ) of **I - III**.

**Table S9.** The infrared vibrations and assignments of **I - IV** in detail (Vibrational frequencies/ $\text{cm}^{-1}$ ).

**Figure S1.** The calculated and experimental PXRD patterns for (a) **I**, (b) **II**, (c) **III** and (d) **IV**.

**Figure S2.** EDS analysis of (a) **I**, (b) **II**, (c) **III** and (d) **IV**.

**Figure S3.** The TG and DSC curves of (a) **I**, (b) **II**, (c) **III** and (d) **IV**.

**Figure S4.** The IR spectra of (a) **I**, (b) **II**, (c) **III** and (d) **IV**.

**Figure S5.** The Raman spectra of (a) **I**, (b) **II**, (c) **III** and (d) **IV**.

**Figure S6.** Photographs of crystal (a) **I**, (b) **II**, (c) **III** and (d) **IV** for the measurement of birefringence.

**Figure S7.** Calculated band structures (a) and the partial density of states of constituent atoms in **IV** (b).

**Figure S8.** The conjugated  $\pi$ -bond state around -5 eV and anti- $\pi$  bond state around 4 eV on  $\text{H}_3\text{C}_3\text{N}_3\text{O}_3$  neutral molecule.

**Figure S9.** Calculated band structures of (a) **I**, (b) **II** and (c) **III**.

**Figure S10.** The partial density of states of constituent atoms in (a) **I**, (b) **II** and (c) **III**.

**Figure S11.** The comparison between  $\text{Na}_3(\text{C}_3\text{N}_3\text{O}_3)$  and  $\text{Ba}_2\text{M}(\text{C}_3\text{N}_3\text{O}_3)_2$  series ( $\text{M} = \text{Mg}, \text{Ca}, \text{Sr}, \text{Ba}$ ).

**Figure S12.** The  $p$ - $\pi$ -interaction between Br 4*p* orbitals and  $\pi$ -bond on cyanuric molecules.

**Figure S13.** The simulated refractive indexes of (a) **I**, (b) **II** and (c) **III**.

## 1. Supplementary Tables.

**Table S1.** Fractional atomic coordinates ( $\times 10^4$ ) and equivalent isotropic displacement parameters

( $\text{\AA}^2 \times 10^3$ ) of **I**.

| Atom | <i>x</i>    | <i>y</i>  | <i>z</i> | $U_{(\text{eq})}^{\text{a}}$ |
|------|-------------|-----------|----------|------------------------------|
| Br1  | 13781.1(11) | 4365.5(7) | 2500     | 29.3(2)                      |
| Rb1  | 8652.7(10)  | 2874.6(7) | 2500     | 31.2(2)                      |
| O1   | 8871(5)     | 5596(4)   | 3789(3)  | 35.1(10)                     |
| O2   | 3075(7)     | 7500      | 5000     | 41.2(16)                     |
| N1   | 8882(8)     | 7500      | 5000     | 22.9(14)                     |
| N2   | 5955(6)     | 6482(5)   | 4424(4)  | 26.5(12)                     |
| C1   | 7961(7)     | 6460(6)   | 4360(4)  | 23.4(13)                     |
| C2   | 4893(10)    | 7500      | 5000     | 24.8(18)                     |

<sup>a</sup> $U_{(\text{eq})}$  is defined as one-third of the trace of the orthogonalized  $U_{ij}$

tensor.

**Table S2.** Fractional atomic coordinates ( $\times 10^4$ ) and equivalent isotropic displacement parameters ( $\text{\AA}^2 \times 10^3$ ) of **II**.

| Atom | <i>x</i>  | <i>y</i> | <i>z</i>   | $U_{(\text{eq})}^{\text{a}}$ |
|------|-----------|----------|------------|------------------------------|
| I1   | 3499.4(5) | 2500     | 10663.9(2) | 14.56(12)                    |
| Rb1  | 4526.5(7) | 2500     | 7967.5(4)  | 14.88(15)                    |
| O2   | 3438(4)   | 5255(4)  | 3225(2)    | 18.0(7)                      |
| O1   | 2901(5)   | 2500     | 6067(3)    | 16.9(10)                     |
| N1   | 3310(5)   | 3893(5)  | 4657(3)    | 12.9(7)                      |
| N2   | 3535(7)   | 2500     | 3219(3)    | 15.3(11)                     |
| C1   | 3160(7)   | 2500     | 5189(4)    | 14.4(13)                     |
| C2   | 3422(5)   | 3980(6)  | 3659(3)    | 13.7(9)                      |

<sup>a</sup> $U_{(\text{eq})}$  is defined as one-third of the trace of the orthogonalized  $U_{ij}$  tensor.

**Table S3.** Fractional atomic coordinates ( $\times 10^4$ ) and equivalent isotropic displacement parameters ( $\text{\AA}^2 \times 10^3$ ) of **III**.

| Atom | <i>x</i>   | <i>y</i>  | <i>z</i> | $U_{\text{(eq)}}^{\text{a}}$ |
|------|------------|-----------|----------|------------------------------|
| Cs1  | 11319.2(8) | 2106.4(6) | 7500     | 30.7(2)                      |
| Br1  | 6240.8(13) | 611.4(10) | 7500     | 32.6(3)                      |
| O1   | 8703(6)    | 4378(6)   | 6152(4)  | 42.4(12)                     |
| O2   | 2939(10)   | 2500      | 5000     | 44.8(18)                     |
| N1   | 8730(11)   | 2500      | 5000     | 28.6(16)                     |
| N2   | 5818(8)    | 3490(6)   | 5563(4)  | 29.4(12)                     |
| C1   | 7794(10)   | 3525(8)   | 5622(5)  | 29.5(14)                     |
| C2   | 4735(14)   | 2500      | 5000     | 28.6(19)                     |

<sup>a</sup> $U_{\text{(eq)}}$  is defined as one-third of the trace of the orthogonalized  $U_{ij}$  tensor.

**Table S4.** Anisotropic displacement parameters ( $\text{\AA}^2 \times 10^3$ ) of **I**.

| Atom | $U_{11}$ | $U_{12}$ | $U_{33}$ | $U_{23}$  | $U_{13}$ | $U_{12}$ |
|------|----------|----------|----------|-----------|----------|----------|
| Br1  | 27.3(4)  | 26.9(4)  | 33.6(6)  | 0         | 0        | -1.5(3)  |
| Rb1  | 31.4(4)  | 24.4(4)  | 38.0(6)  | 0         | 0        | 2.6(4)   |
| O1   | 28.2(19) | 41(2)    | 36(3)    | -15.1(19) | 4.3(19)  | 4.0(19)  |
| O2   | 12(2)    | 46(4)    | 65(5)    | -7(3)     | 0        | 0        |
| N1   | 9(3)     | 30(3)    | 30(4)    | -7(3)     | 0        | 0        |
| N2   | 16(2)    | 27(2)    | 37(4)    | -8(2)     | -1(2)    | -4(2)    |
| C1   | 22(3)    | 30(3)    | 19(3)    | 3(3)      | 1(2)     | -1(2)    |
| C2   | 21(4)    | 28(4)    | 26(5)    | -1(4)     | 0        | 0        |

<sup>a</sup> $U_{(\text{eq})}$  is defined as one-third of the trace of the orthogonalized  $U_{ij}$  tensor.

**Table S5.** Anisotropic displacement parameters ( $\text{\AA}^2 \times 10^3$ ) of **II**.

| Atom | $U_{11}$ | $U_{12}$ | $U_{33}$  | $U_{23}$ | $U_{13}$ | $U_{12}$ |
|------|----------|----------|-----------|----------|----------|----------|
| I1   | 16.4(2)  | 16.8(2)  | 10.52(17) | 0        | 0.24(14) | 0        |
| Rb1  | 13.0(3)  | 20.9(4)  | 10.7(2)   | 0        | 0.7(2)   | 0        |
| O2   | 24.4(16) | 11.6(17) | 18.1(14)  | 4.2(13)  | 3.1(12)  | -0.3(14) |
| O1   | 18(2)    | 23(3)    | 10.3(19)  | 0        | -0.8(16) | 0        |
| N1   | 14.4(17) | 9(2)     | 14.9(16)  | -2.3(15) | -0.1(13) | 1.9(15)  |
| N2   | 22(3)    | 16(3)    | 8(2)      | 0        | 2(2)     | 0        |
| C1   | 9(3)     | 20(4)    | 14(3)     | 0        | -1(2)    | 0        |
| C2   | 11.4(19) | 17(3)    | 12.4(18)  | 0.2(17)  | -2.7(15) | -1.5(19) |

<sup>a</sup> $U_{(\text{eq})}$  is defined as one-third of the trace of the orthogonalized  $U_{ij}$  tensor.

**Table S6.** Anisotropic displacement parameters ( $\text{\AA}^2 \times 10^3$ ) of **III**.

| Atom | $U_{11}$ | $U_{12}$ | $U_{33}$ | $U_{23}$ | $U_{13}$ | $U_{12}$ |
|------|----------|----------|----------|----------|----------|----------|
| Cs1  | 31.3(4)  | 26.7(3)  | 34.2(3)  | 0        | 0        | 1.9(2)   |
| Br1  | 28.8(5)  | 30.7(5)  | 38.3(5)  | 0        | 0        | -0.7(4)  |
| O1   | 34(3)    | 42(3)    | 50(3)    | -14(2)   | -6(2)    | -8(2)    |
| O2   | 19(4)    | 59(5)    | 56(4)    | -5(4)    | 0        | 0        |
| N1   | 23(4)    | 31(4)    | 31(4)    | -7(3)    | 0        | 0        |
| N2   | 24(3)    | 30(3)    | 35(3)    | -5(3)    | 3(2)     | 5(2)     |
| C1   | 32(4)    | 26(3)    | 30(3)    | 4(3)     | -4(3)    | -3(3)    |
| C2   | 30(5)    | 28(5)    | 27(4)    | 6(4)     | 0        | 0        |

<sup>a</sup> $U_{(\text{eq})}$  is defined as one-third of the trace of the orthogonalized  $U_{ij}$  tensor.



**Table S7.** Selected bond lengths [Å] of **I - III**.

| <b>I</b> |          | <b>II</b> |          | <b>III</b> |           |
|----------|----------|-----------|----------|------------|-----------|
| Bond     | Length/Å | Bond      | Length/Å | Bond       | Length/Å  |
| O1-C1    | 1.213(6) | O1-C1     | 1.227(7) | O1-C1      | 1.205(7)  |
| O2-C2    | 1.235(8) | O2-C2     | 1.213(5) | O2-C2      | 1.232(11) |
| N1-C1    | 1.366(5) | N1-C1     | 1.370(5) | N1-C1      | 1.384(8)  |
| N2-C1    | 1.365(6) | N1-C2     | 1.381(5) | N2-C1      | 1.359(8)  |
| N2-C2    | 1.354(5) | N2-C2     | 1.369(5) | N2-C2      | 1.372(7)  |

**Table S8.** Selected bond angles (°) of **I - III**.

| <b>I</b> |          | <b>II</b> |          | <b>III</b> |          |
|----------|----------|-----------|----------|------------|----------|
| Angle    | (°)      | Angle     | (°)      | Angle      | (°)      |
| C2-N2-C1 | 125.0(5) | C1-N1-C2  | 125.6(4) | C1-N2-C2   | 125.8(6) |
| O1-C1-N1 | 122.1(4) | O1-C1-N1  | 122.7(3) | O1-C1-N1   | 121.2(6) |
| O1-C1-N2 | 123.6(5) | O2-C2-N1  | 122.5(4) | O1-C1-N2   | 124.3(7) |
| O2-C2-N2 | 122.2(3) | O2-C2-N2  | 124.0(4) | O2-C2-N2   | 122.8(4) |
| N2-C1-N1 | 114.3(5) | N2-C2-N1  | 113.5(4) | N2-C1-N1   | 114.6(6) |

**Table S9.** The infrared vibrations and assignments of **I - IV** in detail (Vibrational frequencies/cm<sup>-1</sup>).

| <b>I</b>    | <b>II</b>   | <b>III</b>  | <b>IV</b>   | Assignment                               |
|-------------|-------------|-------------|-------------|------------------------------------------|
| 415         |             | 414         |             | $\delta(\text{N-C-O})$                   |
| 528         | 532         | 524         | 540         | $\delta(\text{C=O})$                     |
| 646, 692    | 673         | 641, 692    | 690         | $\delta(\text{CNC}), \delta(\text{NCO})$ |
| 730 - 790   | 718, 758    | 730 - 770   | 769         | $\pi(\text{C-O})$                        |
| 1045        | 1045        | 1050        | 1063        | $\nu(\text{C-O})$                        |
| 1396        | 1384        | 1392        | 1388        | $\nu(\text{C-N})$                        |
| 1462        | 1446, 1575  | 1440 - 1580 | 1475        | $\nu(\text{C}_3\text{N}_3)$              |
| 1700 - 1790 | 1710 - 1780 | 1700 - 1780 | 1700 - 1790 | $\nu(\text{C=O})$                        |
| 2783, 2851  | 2762, 2857  | 2778, 2843  | 2766, 2867  | Hydrogen Bonds                           |
| 3020 - 3260 | 3040 - 3140 | 3030 - 3280 | 2944, 3103  | $\nu(\text{NH})$                         |

## 2. Supplementary Figures.

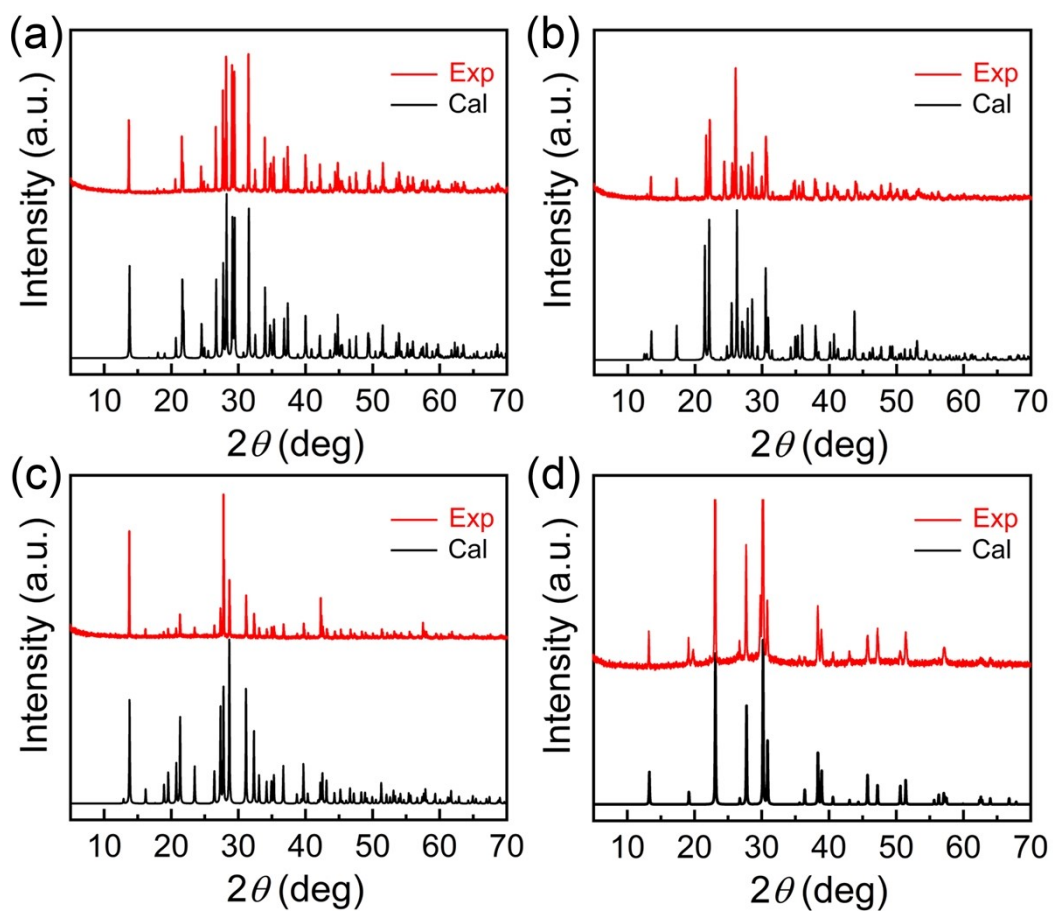

**Figure S1.** The calculated and experimental PXRD patterns for (a) I, (b) II, (c) III and (d) IV.

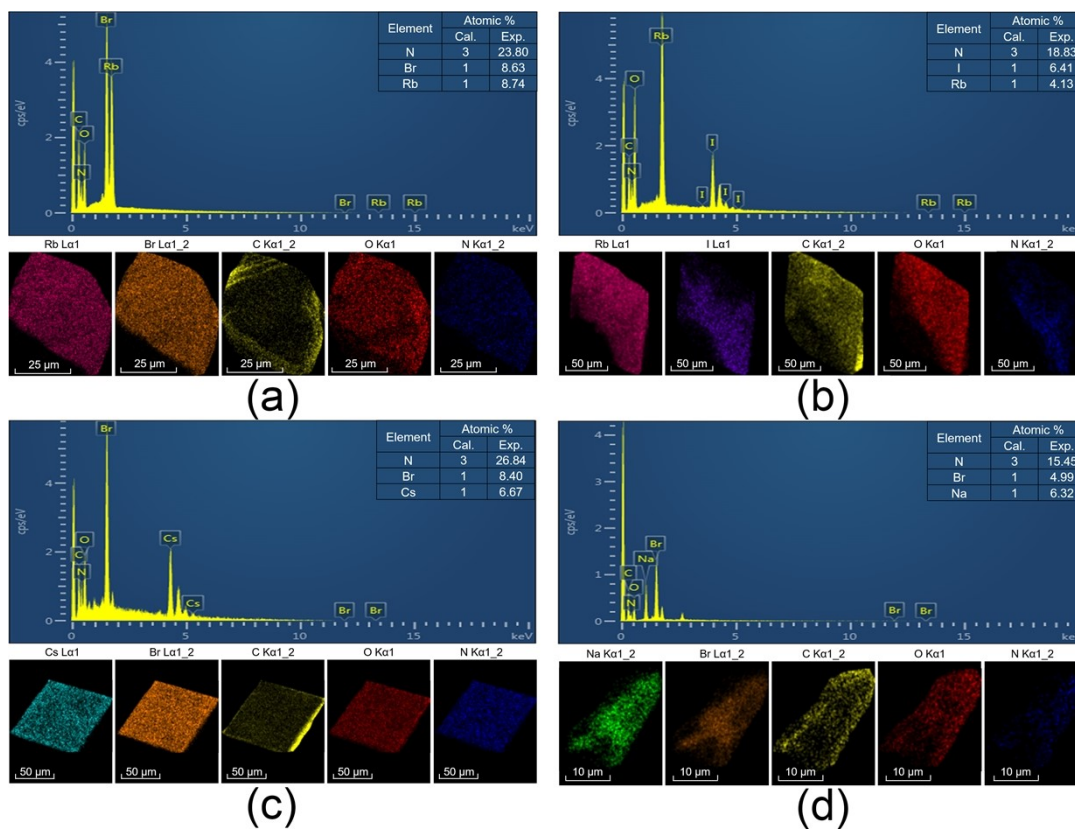

**Figure S2.** EDS analysis of (a) I, (b) II, (c) III and (d) IV.

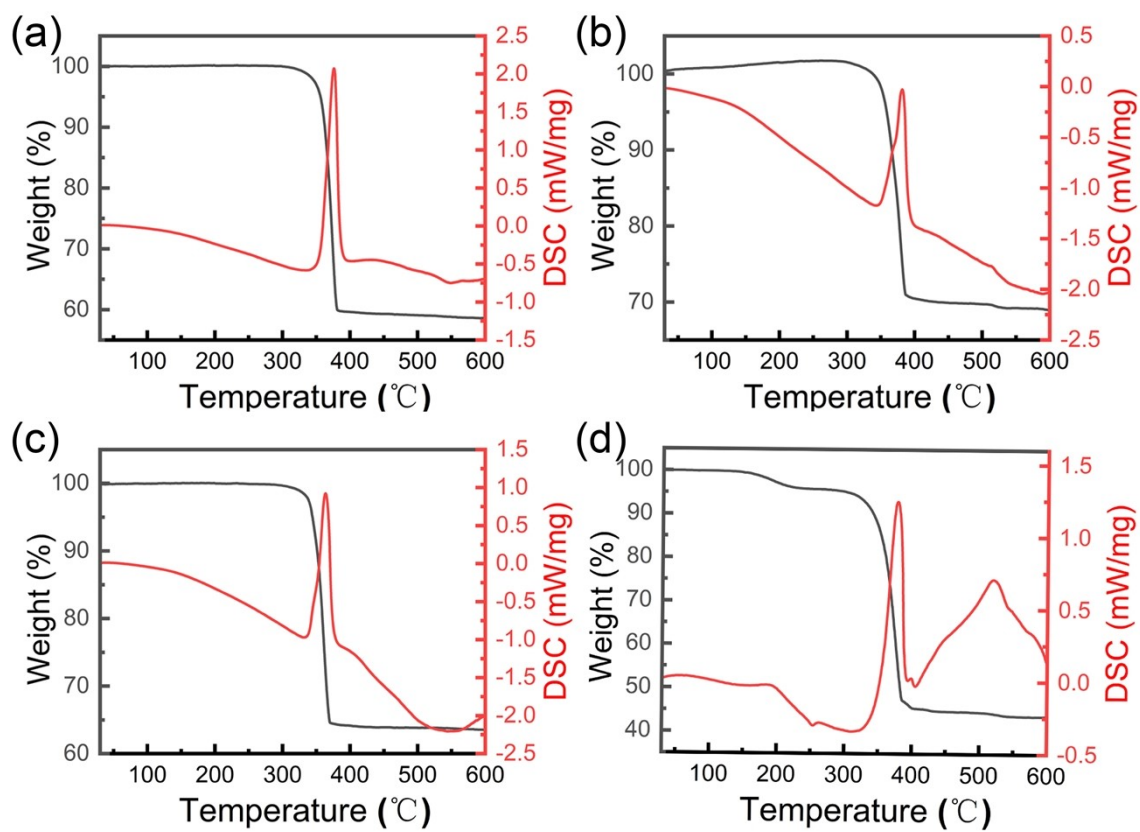

**Figure S3.** The TG and DSC curves of (a) I, (b) II, (c) III and (d) IV.

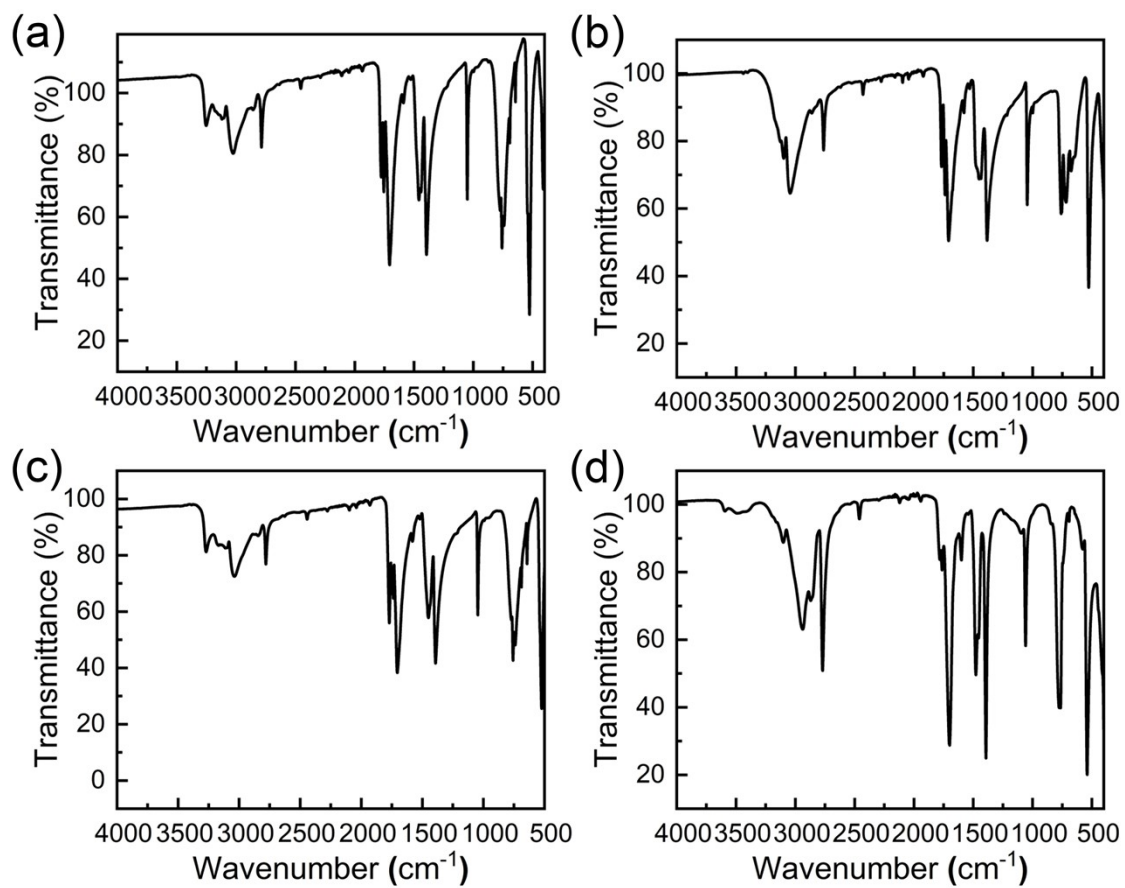

**Figure S4.** The IR spectra of (a) I, (b) II, (c) III and (d) IV.

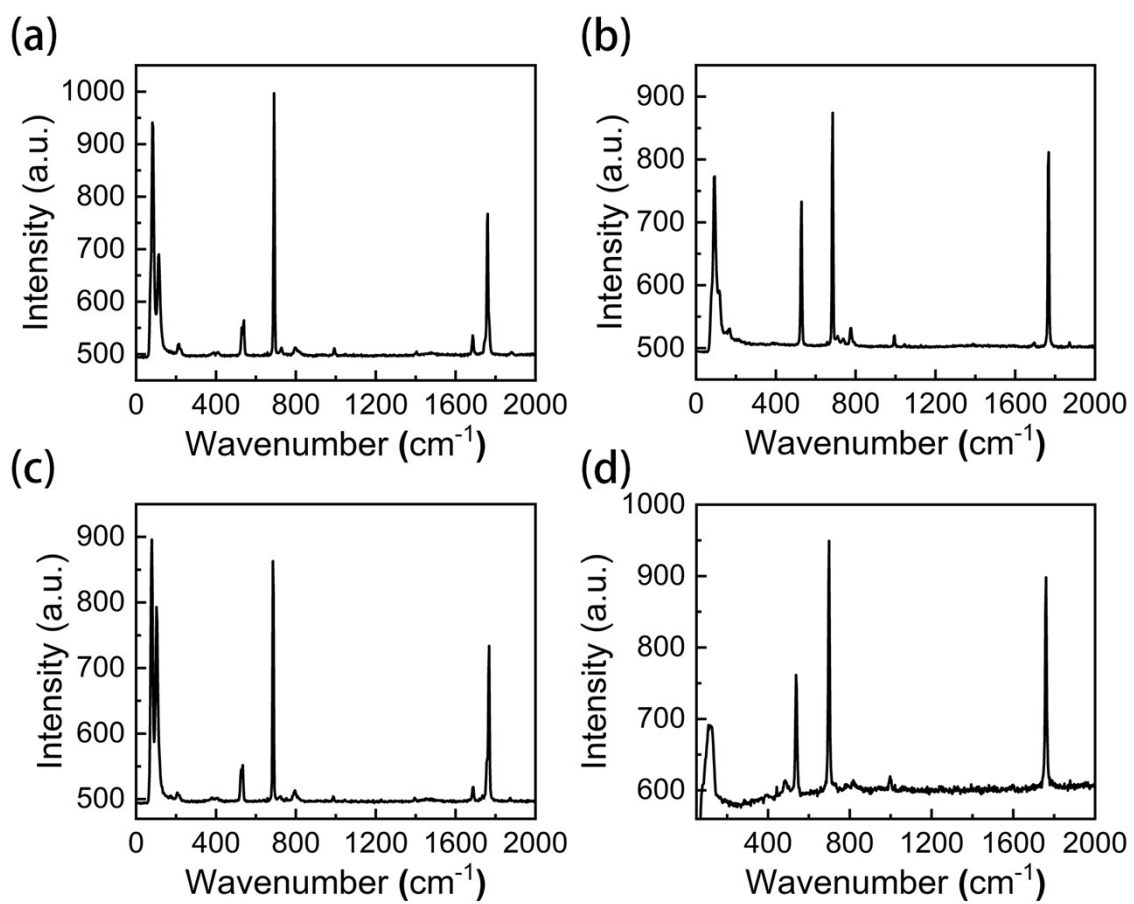

**Figure S5.** The Raman spectra of (a) **I**, (b) **II**, (c) **III** and (d) **IV**.



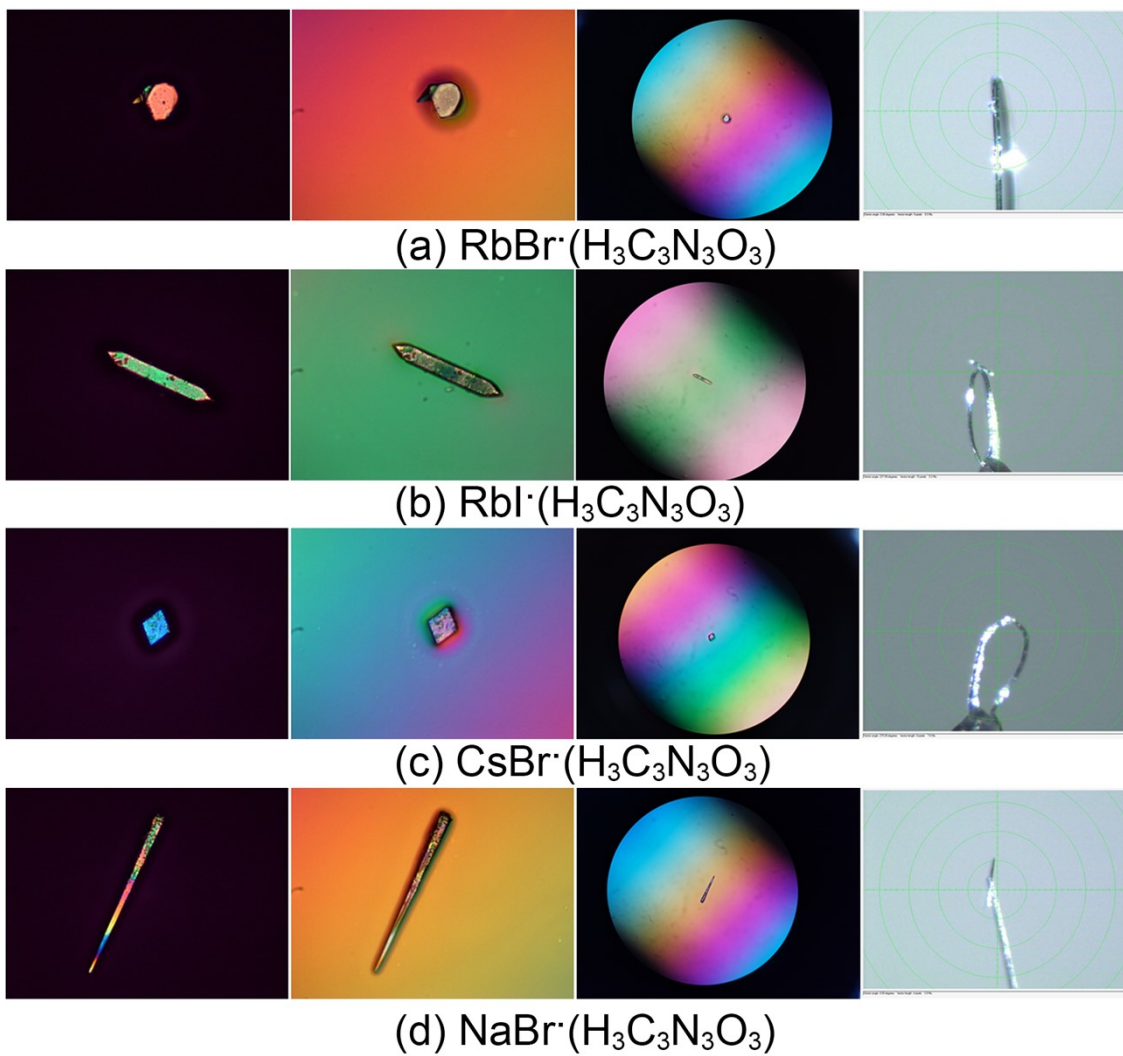

**Figure S6.** Photographs of crystal (a) I, (b) II, (c) III and (d) IV for the measurement of birefringence.

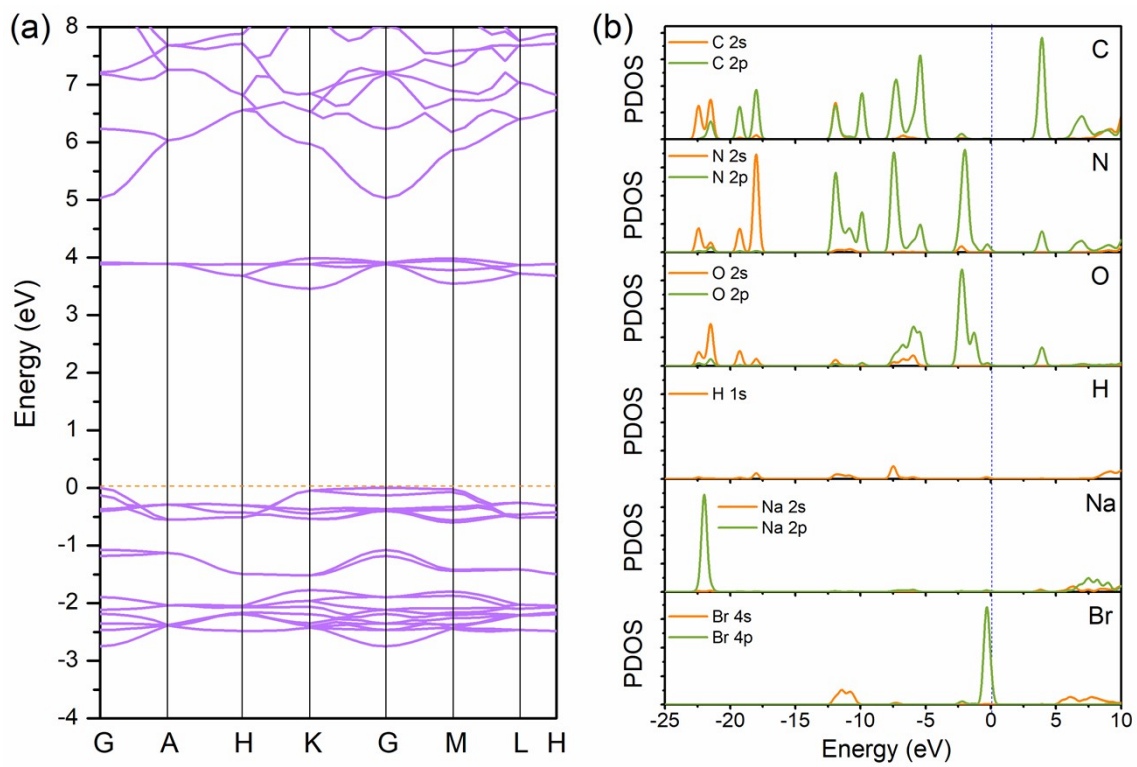

**Figure S7.** Calculated band structures (a) and the partial density of states of constituent atoms in **IV** (b).

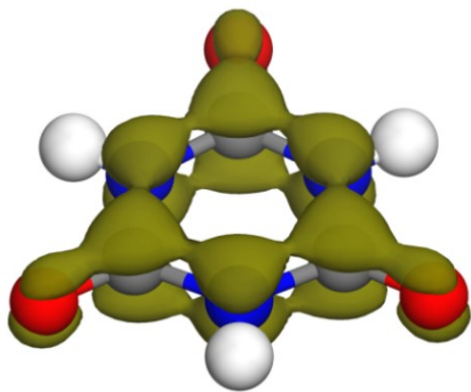

$\pi$ -bond state

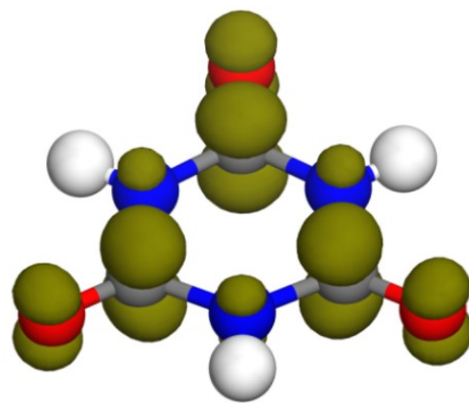

anti- $\pi$  bond state

**Figure S8.** The conjugated  $\pi$ -bond state around -5 eV and anti- $\pi$  bond state around 4 eV on  $\text{H}_3\text{C}_3\text{N}_3\text{O}_3$  neutral molecule.

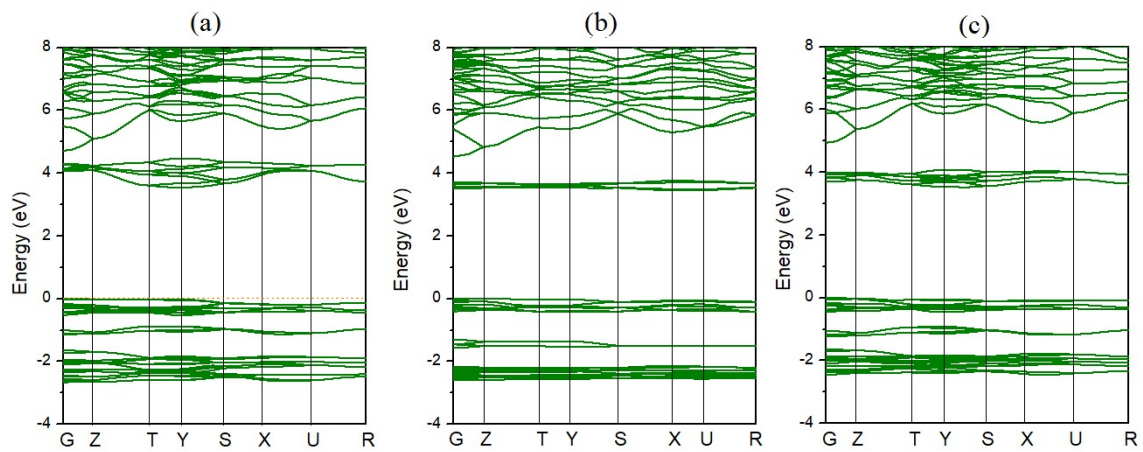

**Figure S9.** Calculated band structures of (a) **I**, (b) **II** and (c) **III**.

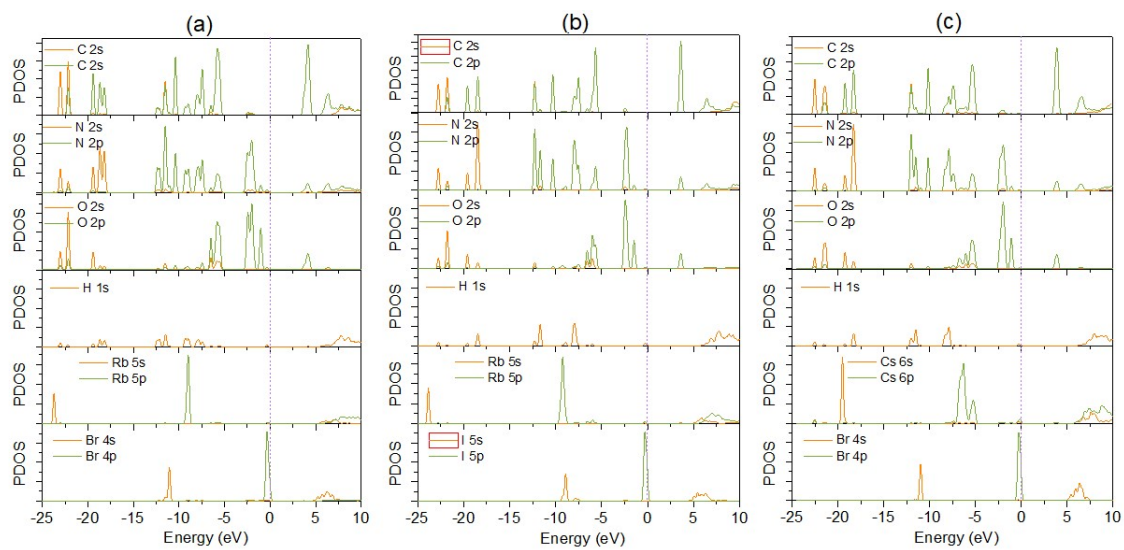

**Figure S10.** The partial density of states of constituent atoms in (a) **I**, (b) **II** and (c) **III**.

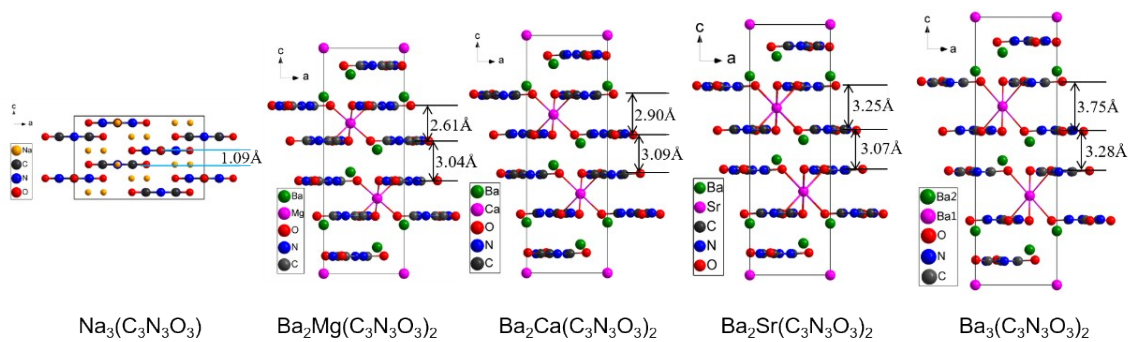

**Figure S11.** The comparison between  $\text{Na}_3(\text{C}_3\text{N}_3\text{O}_3)$  and  $\text{Ba}_2\text{M}(\text{C}_3\text{N}_3\text{O}_3)_2$  series ( $\text{M} = \text{Mg}, \text{Ca}, \text{Sr}, \text{Ba}$ ).

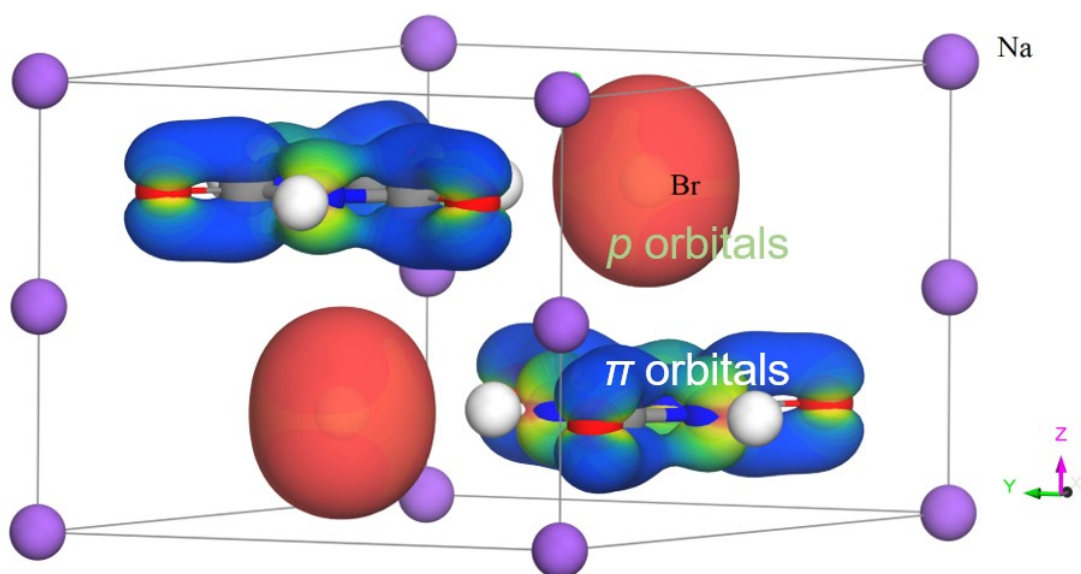

**Figure S12.** The  $p$ - $\pi$ -interaction between Br  $4p$  orbitals and  $\pi$ -bond on cyanuric molecules.

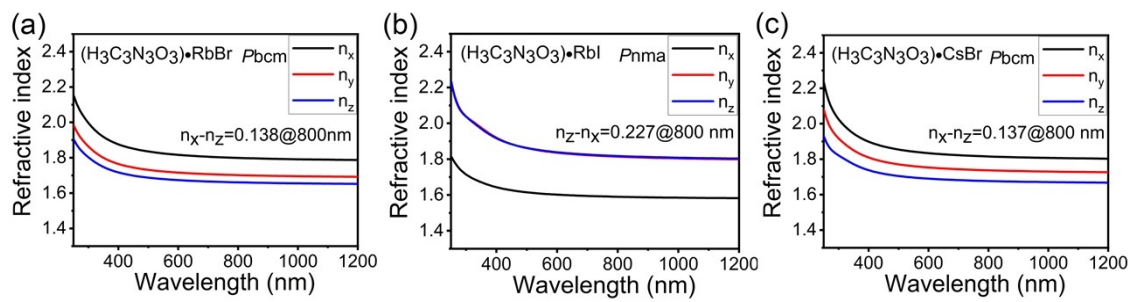

**Figure S13.** The simulated refractive indexes of (a) I, (b) II and (c) III.
